# Supplementary material for: Identification and characterization of microplastics released during the actual use of disposable cups using laser direct infrared imaging
Source: Royal Society of Chemistry journal article supplement (doi:10.1039/d4an01375a), 2025-01-01
Supplement: d4an01375a1.pdf [file d4an01375a1.pdf]

## Appendix A. Supplementary data

*for*

### Identification and characterization of microplastics released during actual use of disposable cups using laser direct infrared imaging

Shanshan Du\*, Ziyang Liu, Lei Wu, Fangbiao Tao

MOE Key Laboratory of Population Health Across Life Cycle; Department of Maternal, Child and Adolescent Health, School of Public Health; Anhui Provincial Key Laboratory of Environment and Population Health across the Life Course, Anhui Medical University, Hefei, 230032, China

Corresponding Author

E-mail: [2022500064@ahmu.edu.cn](mailto:2022500064@ahmu.edu.cn);

#### Table of Content

Fig. S1 Optical and LDIR images of ethanol, Mirr-IR low-E glass slides after cleaning.

Fig. S2 TEM, IR imaging images, IR spectrum matching and optical images of PS standard particles.

Fig. S3 Size distribution and IR imaging images of MPs with different filtration times.

Fig. S4 Different plastic cups in the color-highlighted images of particles.

Fig. S5 The matching identification of the IR spectrum of particles filtered from water in disposable cups with the spectra in the spectral library.

Fig. S6 The influence of temperature on the release of MP in PP plastic cups.

Fig. S7 Size distribution and composition of MPs released by PS plastic cups at 50°C for 15 min.

Fig. S8 IR spectra of MPs released at different water temperatures.

Fig. S9 AFM image of untreated PP plastic cup surface after being kept at 4°C for 15 min.

Table S1 Recovery test on PS particles.

Table S2 Estimation of daily exposure to MPs.

Table S3 Summary and comparison of MPs release from disposable cups.

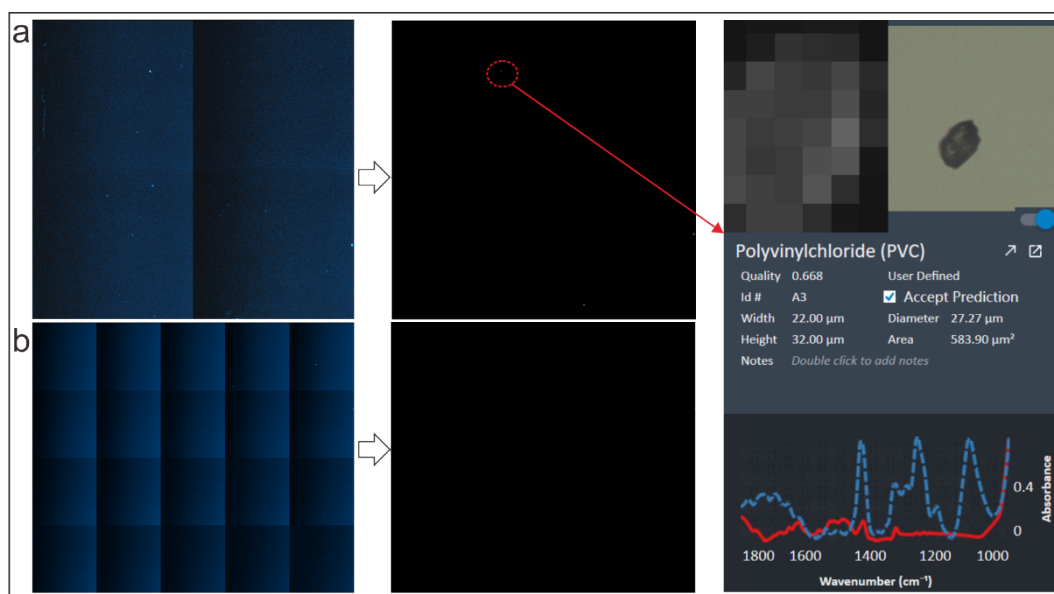

**Fig. S1** Optical and LDIR images of ethanol, Mirr-IR low-E glass slides after cleaning.

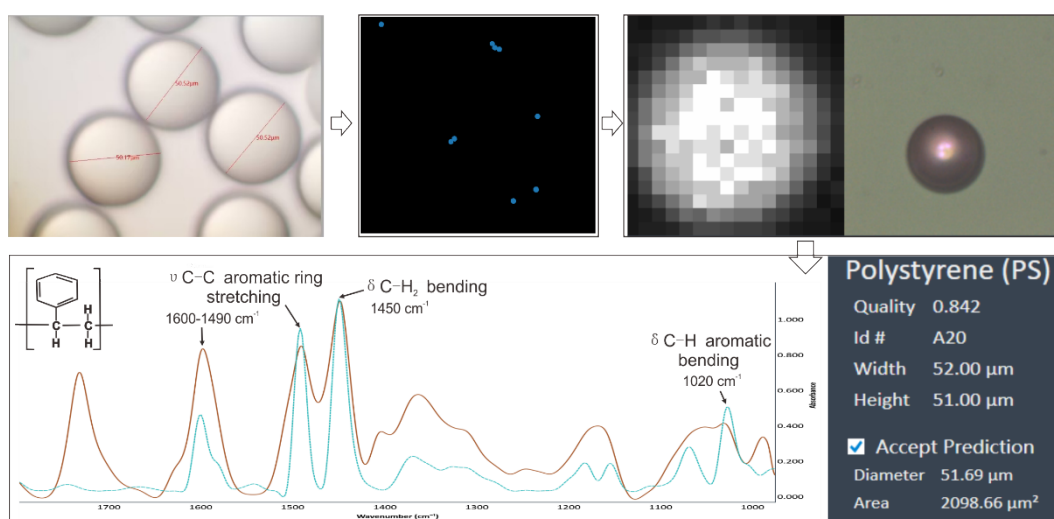

**Fig. S2** TEM, IR imaging images, IR spectrum matching and optical images of PS standard particles (50  $\mu\text{m}$ ).

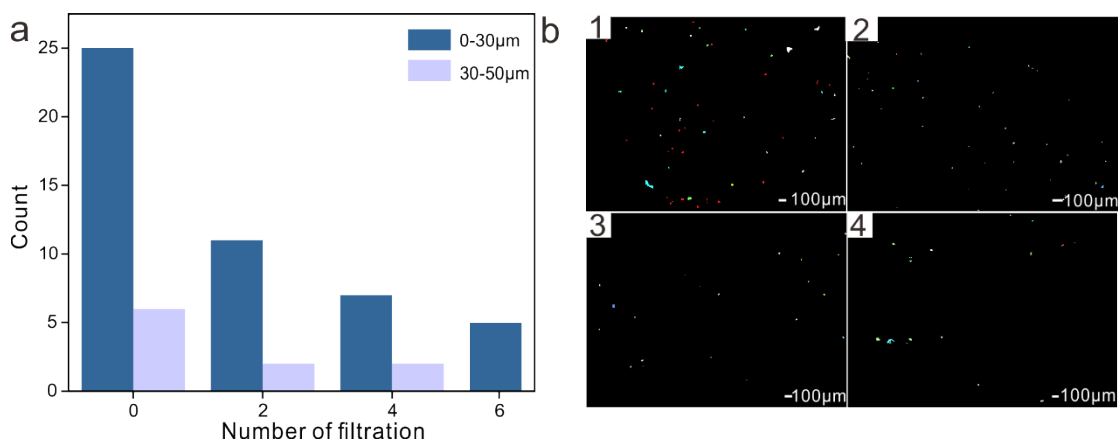

**Fig. S3** Size distribution and IR imaging images of MPs with different filtration times.

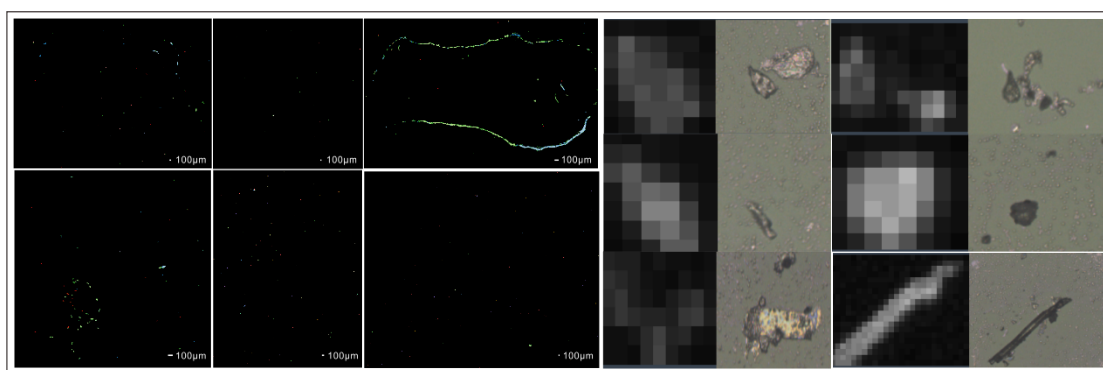

**Fig. S4** Different plastic cups in the color-highlighted images of particles after LDIR identification (left) and the IR and optical images of particles (right).

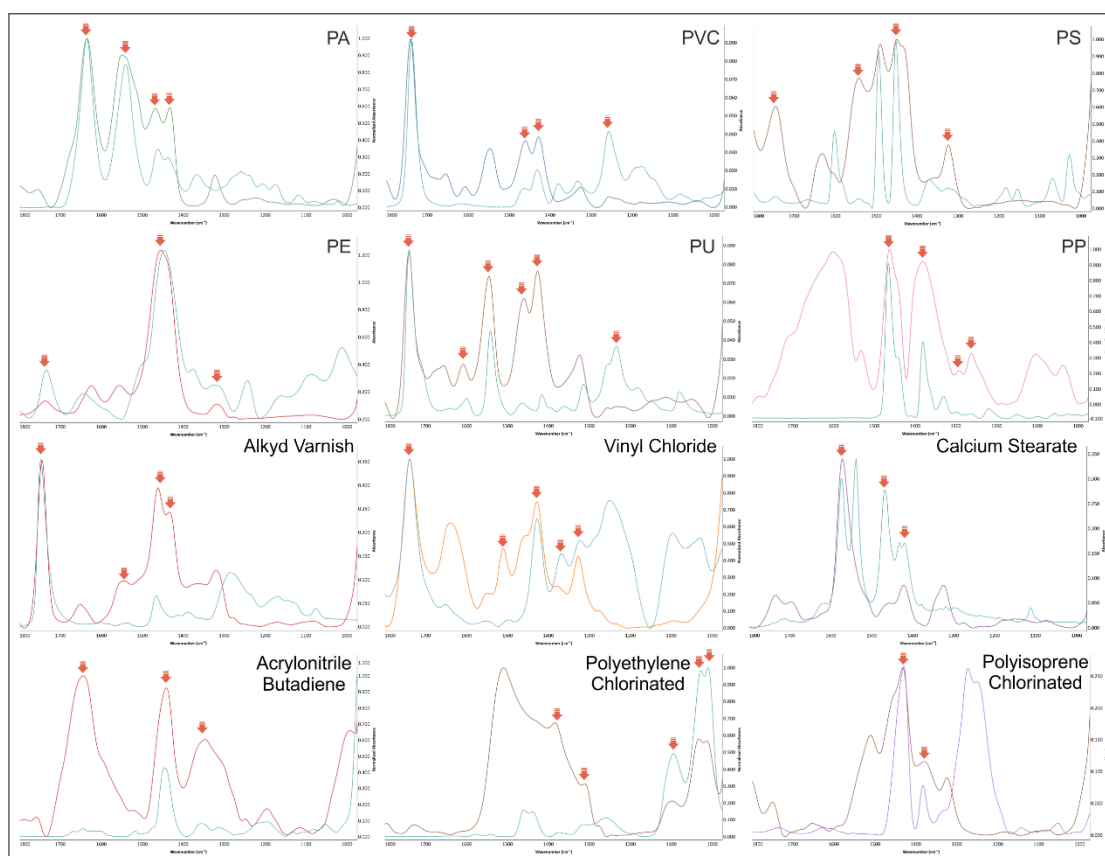

**Fig.S5** The matching identification of the IR spectrum of particles filtered from water in disposable cups with the spectra in the spectral library.

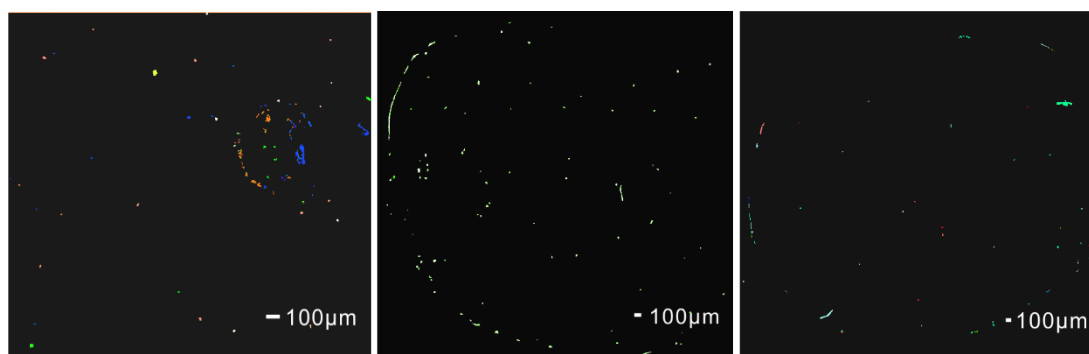

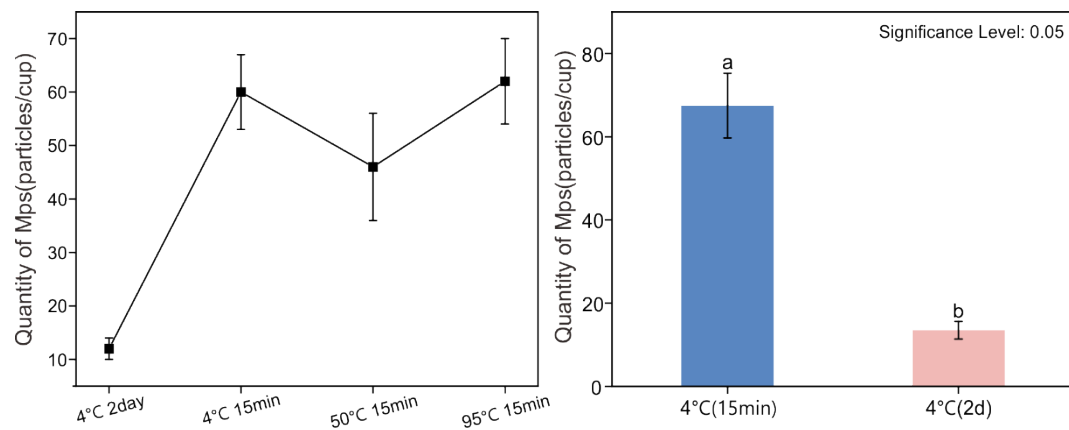

**Fig. S6** The influence of temperature on the release of MP in PP plastic cups.

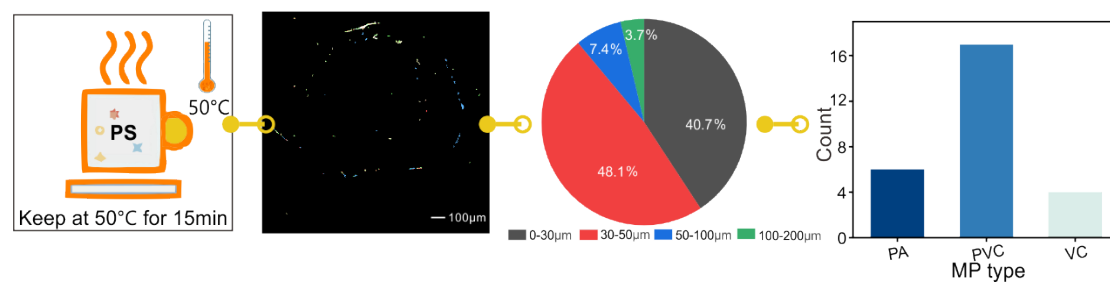

**Fig. S7** Size distribution and composition of MPs released by PS plastic cups at 50°C for 15 min.

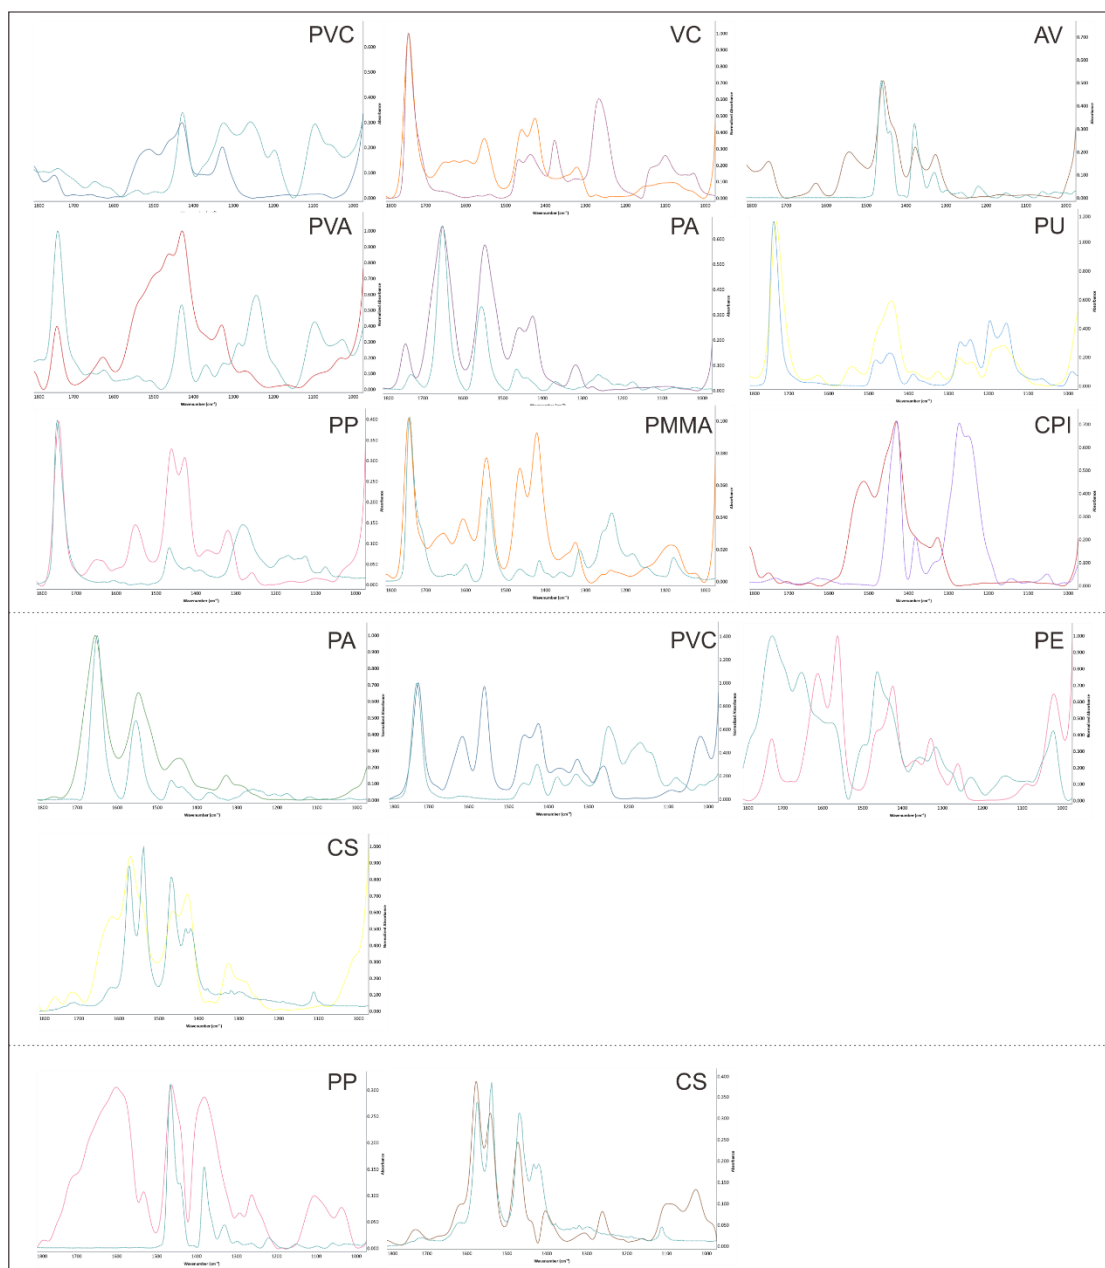

**Fig. S8** IR spectra of MPs released at different water temperatures, including (top) maintaining at 4°C for 15 min, (middle) maintaining at 50°C for 15 min, and (bottom) maintaining at 4°C for 48h.

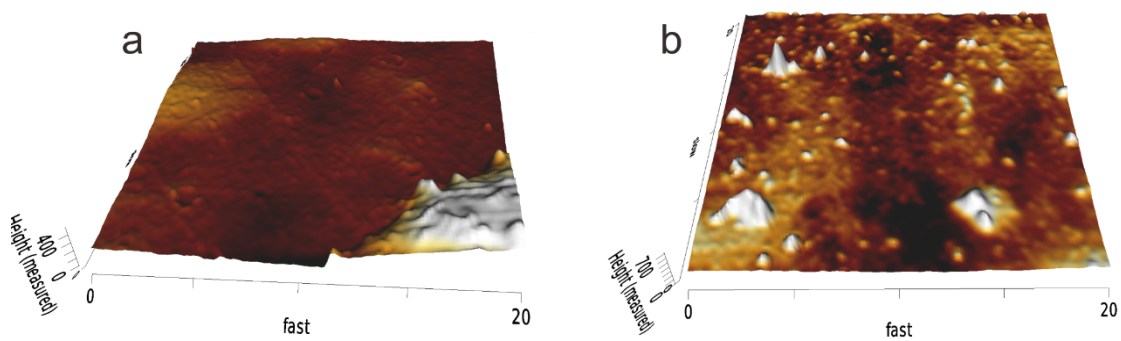

**Fig. S9** AFM image of untreated PP plastic cup surface (a) after being kept at 4°C for 15 min (b).

**Table S1**

Recovery test on PS particles.

|                       | Count |
|-----------------------|-------|
| Actual particles      | 60    |
| Theoretical particles | 79    |
| Recovery (%)          | 86.1  |

**Table S2**

Estimation of daily exposure to MPs.

| Bulk material | MPs release (particle/L) | Daily exposure |
|---------------|--------------------------|----------------|
| PP            | 980                      | 294            |
| PS            | 1340                     | 402            |

**Table S3**

Summary and comparison of MPs release from disposable cups, including study results.

| Material        | Release factor      | Conditions          | Method                                                     | MPs quantity                   | MPs size | MPs types          |
|-----------------|---------------------|---------------------|------------------------------------------------------------|--------------------------------|----------|--------------------|
| PP              | Residence           | 95°C 5min/30min     | Identification:                                            | 723-1489/L                     | < 50 µm  | —                  |
| PET             | time Shaking        | 120r 5min/30min     | FTIR                                                       |                                |          |                    |
| PE <sup>1</sup> | Temperatures        | 5°C/60°C            | Quantification:<br>SEM                                     |                                |          |                    |
| PE              | Temperatures        | 10°C/40°C/70°C/95°C | Identification:                                            | 2718, 2720, 2629 /L            | < 20 µm  | —                  |
| PP              | Contained           | Soda/water/Carbonat | Raman                                                      |                                |          |                    |
| PS <sup>2</sup> | liquid              | ed beverage         | Quantification:<br>SEM                                     |                                |          |                    |
| PE <sup>3</sup> | Temperatures        | 100°C 15min         | Identification:<br>FTIR<br>Quantification:<br>Fluorescence | 102+21.1 × 10 <sup>6</sup> /mL | 25000µm  | —                  |
| This work       | Cup materials       | 95°C 15min          |                                                            |                                |          |                    |
| PP              | Temperatures        | 4°C/50°C/95°C       | LDIR                                                       | 980-1340/L                     | < 30 µm  | PA, PVC,           |
| PS              | Contained<br>liquid | Tea/pure water      |                                                            |                                |          | VC, PP,<br>PS..... |

**Reference**

- 1 G. Zhou, Q. Wu, P. Tang, C. Chen, X. Cheng, X. F. Wei, J. Ma, B. Liu, *J. Hazard. Mater*, 2023, **441**, 129982.
- 2 H. Chen, L. Xu, K. Yu, F. Wei, M. Zhang, *Sci. Total Environ*, 2023, **854**, 158606.
- 3 V. P. Ranjan, A. Joseph, S. Goel, *J. Hazard. Mater* 2021, **404**, 124118.
